# Supplementary material
Source: PubMed Central journal article supplement (PMC5319707)

Dynamics of the human gut microbiome in Inflammatory Bowel Disease

Halfvarson et al. Nature Microbiology, 2016

Supplementary Information

**Supplementary Video 1. Dynamics of healthy controls and IBD subtypes within ordinated UniFrac space.** This video illustrates the dynamics along a "healthy plane" for healthy controls. By contrast, the IBD subjects move in a 3rd dimension away from the healthy plane. The extent of this deviation from the healthy plane is quantified and significant for the different IBD subtypes (data shown in Figure 2).

**Legend for Supplementary Video 1.**

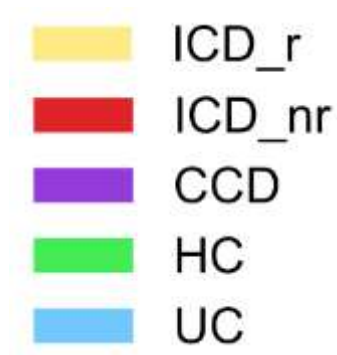

**Supplementary Dataset 1. Clinical metadata for patients and samples.** This QIIME compatible mapping file lists the genetic and clinical context of each sample used in this study. It is available on Qiita as study 1629 and is linked to the online version of the paper at [www.nature.com/nmicrobiol](http://www.nature.com/nmicrobiol)

**Supplementary Table 1. Summary of the patient cohort**

| Collected samples                   |            |            | Samples used in downstream analysis |           |            |
|-------------------------------------|------------|------------|-------------------------------------|-----------|------------|
| Category                            | Patients   | Samples    | Category                            | Patients  | Samples    |
| Healthy Controls                    | 9          | 62         | Healthy Controls                    | 7         | 32         |
| Colonic Crohn's Disease             | 18         | 94         | Colonic Crohn's Disease             | 11        | 44         |
| Ileal Crohn's Disease, non-resected | 6          | 32         | Ileal Crohn's Disease, non-resected | 4         | 16         |
| Ileal Crohn's Disease, resected     | 25         | 125        | Ileal Crohn's Disease, resected     | 15        | 60         |
| Ulcerative colitis                  | 60         | 324        | Ulcerative colitis                  | 32        | 168        |
| Collagenous colitis                 | 15         | 36         | Collagenous colitis                 | -         | -          |
| Lymphocytic colitis                 | 4          | 10         | Lymphocytic colitis                 | -         | -          |
| <b>Total</b>                        | <b>137</b> | <b>683</b> | <b>Total</b>                        | <b>69</b> | <b>267</b> |
| Female                              | 79         | 378        | Female                              | 36        | 144        |
| Male                                | 58         | 305        | Male                                | 33        | 132        |

**Supplementary Table 2. Clinical features of the Random Forests model**

| Model                                           | CCD   | HC    | ICD_nr | ICD_r | UC    | Mean Decrease in Accuracy | Feature                       |
|-------------------------------------------------|-------|-------|--------|-------|-------|---------------------------|-------------------------------|
| OTUs and clinical metadata.<br>Accuracy: 66.6%  | -0.68 | 2.42  | -2.07  | 10.70 | 5.26  | 10.44                     | Distance to the Healthy Plane |
|                                                 | 0.52  | 0.00  | 1.00   | -1.55 | 0.23  | 0.14                      | BMI                           |
|                                                 | 0.00  | 1.00  | 0.00   | -0.69 | 0.00  | 0.00                      | sex                           |
|                                                 | -1.71 | 0.98  | -1.00  | 1.75  | -3.13 | -1.03                     | f-calprotectin                |
| With Genetic Load Scores (GLS)<br>Accuracy: 68% | 2.07  | 3.20  | -1.08  | 11.15 | 7.61  | 11.52                     | Distance to the Healthy Plane |
|                                                 | 0.35  | 2.89  | -1.38  | 2.81  | 6.73  | 5.87                      | Genetic Load Scores           |
|                                                 | 1.00  | 0.00  | 0.00   | 0.25  | 1.41  | 1.13                      | sex                           |
|                                                 | -0.33 | 0.73  | 1.27   | -0.08 | -2.17 | -1.44                     | f-calprotectin                |
|                                                 | -1.12 | -1.18 | 0.71   | -1.84 | -0.85 | -1.77                     | BMI                           |

Clinical and microbial features as predicted by the Random Forests model, with and without the addition of Genetic Load Scores.

**Supplementary Table 3. Top features of the Random Forests model**

| Model                                        | CCD  | HC    | ICD_nr | ICD_r | UC   | Mean Decrease in Accuracy | Feature Name or Taxonomy                                                                     |                 |                 |                           |                           |
|----------------------------------------------|------|-------|--------|-------|------|---------------------------|----------------------------------------------------------------------------------------------|-----------------|-----------------|---------------------------|---------------------------|
| OTUs and clinical metadata. Accuracy: 66.6%  | -    |       |        |       |      |                           | Distance to the Healthy Plane                                                                |                 |                 |                           |                           |
|                                              | 0.68 | 2.42  | -2.07  | 10.70 | 5.26 | 10.44                     | Proteobacteria Gammaproteobacteria Alteromonadales [Chromatiaceae] [Unassigned] [Unassigned] |                 |                 |                           |                           |
|                                              | 0.19 | 0.73  | -0.54  | 8.98  | 3.95 | 8.79                      |                                                                                              |                 |                 |                           |                           |
|                                              | -    |       |        |       |      |                           |                                                                                              |                 |                 |                           |                           |
|                                              | 4.03 | 0.22  | 1.34   | 5.08  | 7.50 | 7.66                      | Firmicutes                                                                                   | Clostridia      | Clostridiales   | Ruminococcaceae           | [Unassigned] [Unassigned] |
|                                              | 0.11 | 1.10  | -1.29  | 8.61  | 0.20 | 7.55                      | Firmicutes                                                                                   | Clostridia      | Clostridiales   | Ruminococcaceae           | [Unassigned] [Unassigned] |
|                                              | 0.74 | 2.18  | -1.28  | 7.79  | 2.64 | 7.42                      | Firmicutes                                                                                   | Clostridia      | Clostridiales   | Clostridiaceae            | Clostridium [Unassigned]  |
|                                              | -    |       |        |       |      |                           |                                                                                              |                 |                 |                           |                           |
|                                              | 0.24 | 0.41  | 0.00   | 8.46  | 0.35 | 7.29                      | Firmicutes                                                                                   | Clostridia      | Clostridiales   | Ruminococcaceae           | [Unassigned] [Unassigned] |
|                                              | -    |       |        |       |      |                           |                                                                                              |                 |                 |                           |                           |
|                                              | 0.70 | 0.87  | -0.33  | 7.42  | 1.24 | 6.79                      | Firmicutes                                                                                   | Clostridia      | Clostridiales   | Lachnospiraceae           | Lachnospira [Unassigned]  |
|                                              | -    |       |        |       |      |                           |                                                                                              |                 |                 |                           |                           |
|                                              | 0.17 | 1.49  | -0.58  | 7.13  | 0.29 | 6.76                      | Firmicutes                                                                                   | Clostridia      | Clostridiales   | Ruminococcaceae           | [Unassigned] [Unassigned] |
|                                              | -    |       |        |       |      |                           |                                                                                              |                 |                 |                           |                           |
|                                              | 1.15 | 6.77  | 0.00   | 2.46  | 4.27 | 6.26                      | Firmicutes                                                                                   | Clostridia      | Clostridiales   | [Unassigned]              | [Unassigned] [Unassigned] |
|                                              | -    |       |        |       |      |                           |                                                                                              |                 |                 |                           |                           |
|                                              | 3.33 | 0.58  | -2.61  | 6.42  | 3.20 | 5.97                      | Firmicutes                                                                                   | Clostridia      | Clostridiales   | Ruminococcaceae           | [Unassigned] [Unassigned] |
| -                                            |      |       |        |       |      |                           |                                                                                              |                 |                 |                           |                           |
| 0.31                                         | 0.51 | -1.00 | 6.68   | 0.53  | 5.81 | Firmicutes                | Clostridia                                                                                   | Clostridiales   | Ruminococcaceae | [Unassigned] [Unassigned] |                           |
| -                                            |      |       |        |       |      |                           |                                                                                              |                 |                 |                           |                           |
| 0.64                                         | 1.93 | -1.31 | 4.83   | 5.00  | 5.67 | Firmicutes                | Clostridia                                                                                   | Clostridiales   | Ruminococcaceae | [Unassigned] [Unassigned] |                           |
| 0.03                                         | 1.78 | 1.34  | 4.79   | 3.32  | 5.17 | Firmicutes                | Clostridia                                                                                   | Clostridiales   | Lachnospiraceae | [Unassigned] [Unassigned] |                           |
| -                                            |      |       |        |       |      |                           |                                                                                              |                 |                 |                           |                           |
| 1.02                                         | 2.72 | 1.34  | 5.12   | 3.17  | 5.06 | Firmicutes                | Clostridia                                                                                   | Clostridiales   | Ruminococcaceae | Oscillospira [Unassigned] |                           |
| -                                            |      |       |        |       |      |                           |                                                                                              |                 |                 |                           |                           |
| 0.36                                         | 2.31 | 0.76  | 6.02   | 1.50  | 5.06 | Firmicutes                | Clostridia                                                                                   | Clostridiales   | Ruminococcaceae | [Unassigned] [Unassigned] |                           |
| -                                            |      |       |        |       |      |                           |                                                                                              |                 |                 |                           |                           |
| 0.52                                         | 1.72 | 1.67  | 5.33   | 1.89  | 5.04 | Firmicutes                | Clostridia                                                                                   | Clostridiales   | Lachnospiraceae | [Unassigned] [Unassigned] |                           |
| With Genetic Load Scores (GLS) Accuracy: 68% | 2.07 | 3.20  | -1.08  | 11.15 | 7.61 | 11.52                     | Distance to the Healthy Plane                                                                |                 |                 |                           |                           |
|                                              | -    |       |        |       |      |                           |                                                                                              |                 |                 |                           |                           |
|                                              | 0.18 | 1.97  | -2.72  | 8.82  | 2.58 | 7.94                      | Firmicutes                                                                                   | Clostridia      | Clostridiales   | Ruminococcaceae           | [Unassigned] [Unassigned] |
|                                              | -    |       |        |       |      |                           |                                                                                              |                 |                 |                           |                           |
|                                              | 4.77 | 0.72  | 1.00   | 5.62  | 7.10 | 7.68                      | Firmicutes                                                                                   | Clostridia      | Clostridiales   | Ruminococcaceae           | [Unassigned] [Unassigned] |
|                                              | -    |       |        |       |      |                           |                                                                                              |                 |                 |                           |                           |
|                                              | 0.89 | 1.78  | -0.63  | 8.15  | 1.19 | 7.62                      | Proteobacteria Gammaproteobacteria Alteromonadales                                           | [Chromatiaceae] | [Unassigned]    | [Unassigned]              |                           |
|                                              | 1.98 | 0.53  | -0.32  | 7.93  | 2.62 | 7.52                      | Firmicutes                                                                                   | Clostridia      | Clostridiales   | Clostridiaceae            | Clostridium [Unassigned]  |
|                                              | -    |       |        |       |      |                           |                                                                                              |                 |                 |                           |                           |
|                                              | 0.07 | 0.78  | -1.57  | 7.55  | 0.26 | 6.97                      | Firmicutes                                                                                   | Clostridia      | Clostridiales   | Ruminococcaceae           | [Unassigned] [Unassigned] |
|                                              | -    |       |        |       |      |                           |                                                                                              |                 |                 |                           |                           |
|                                              | 2.86 | 7.25  | 1.00   | 2.27  | 4.71 | 6.84                      | Firmicutes                                                                                   | Clostridia      | Clostridiales   | [Unassigned]              | [Unassigned] [Unassigned] |
|                                              | -    |       |        |       |      |                           |                                                                                              |                 |                 |                           |                           |
|                                              | 0.47 | 1.30  | 1.45   | 7.04  | 1.53 | 6.32                      | Firmicutes                                                                                   | Clostridia      | Clostridiales   | Ruminococcaceae           | [Unassigned] [Unassigned] |
|                                              | -    |       |        |       |      |                           |                                                                                              |                 |                 |                           |                           |
| 0.28                                         | 0.07 | -0.58 | 7.25   | 1.32  | 6.28 | Firmicutes                | Clostridia                                                                                   | Clostridiales   | Lachnospiraceae | Lachnospira [Unassigned]  |                           |
| -                                            |      |       |        |       |      |                           |                                                                                              |                 |                 |                           |                           |
| 0.07                                         | 1.57 | -1.04 | 6.95   | 2.87  | 6.28 | Firmicutes                | Clostridia                                                                                   | Clostridiales   | Ruminococcaceae | Oscillospira [Unassigned] |                           |
| -                                            |      |       |        |       |      |                           |                                                                                              |                 |                 |                           |                           |
| 0.02                                         | 1.75 | 0.63  | 5.68   | 6.04  | 6.14 | Firmicutes                | Clostridia                                                                                   | Clostridiales   | Ruminococcaceae | [Unassigned] [Unassigned] |                           |
| -                                            |      |       |        |       |      |                           |                                                                                              |                 |                 |                           |                           |
| 1.48                                         | 1.36 | -1.00 | 7.06   | 1.42  | 6.01 | Firmicutes                | Clostridia                                                                                   | Clostridiales   | Ruminococcaceae | [Unassigned] [Unassigned] |                           |
| -                                            |      |       |        |       |      |                           |                                                                                              |                 |                 |                           |                           |
| 0.35                                         | 2.89 | -1.38 | 2.81   | 6.73  | 5.87 | Firmicutes                | Clostridia                                                                                   | Clostridiales   | Ruminococcaceae | [Unassigned] [Unassigned] |                           |
| -                                            |      |       |        |       |      |                           |                                                                                              |                 |                 |                           |                           |
|                                              |      |       |        |       |      |                           | Genetic Load                                                                                 | Score           |                 |                           |                           |

|      |      |       |      |      |      |            |            |               |                 |              |              |
|------|------|-------|------|------|------|------------|------------|---------------|-----------------|--------------|--------------|
| 0.07 | 0.50 | 0.00  | 4.75 | 4.20 | 5.29 | Firmicutes | Clostridia | Clostridiales | Lachnospiraceae | [Unassigned] | [Unassigned] |
| 0.73 | 0.68 | -1.34 | 5.44 | 3.20 | 5.28 | Firmicutes | Clostridia | Clostridiales | Ruminococcaceae | [Unassigned] | [Unassigned] |
| 1.87 | 0.99 | -1.73 | 6.08 | 0.73 | 5.24 | Firmicutes | Clostridia | Clostridiales | Ruminococcaceae | [Unassigned] | [Unassigned] |
| 0.54 | 2.94 | 1.64  | 4.13 | 3.54 | 5.04 | Firmicutes | Clostridia | Clostridiales | Lachnospiraceae | [Unassigned] | [Unassigned] |

Clinical and microbial features are shown that were predicted by the Random Forests model to decrease cumulative accuracy by at least 5% if permuted.

#### Supplementary Table 4. Power Analysis for differential abundance tests

| Fold-Change in Means | Proportion of OTUS with >80% Power | Median Power |
|----------------------|------------------------------------|--------------|
| 1.25                 | 0.9471                             | 0.8432       |
| 1.5                  | 0.9613                             | 0.9015       |
| 2                    | 1.0000                             | 0.9999       |

The proportion of the 1000 OTUs which had at least 80% power and the median power over the 1000 OTUs for each fold change.

#### Supplementary Figure 1. The gut microbiomes of different IBD subtypes differ in community composition

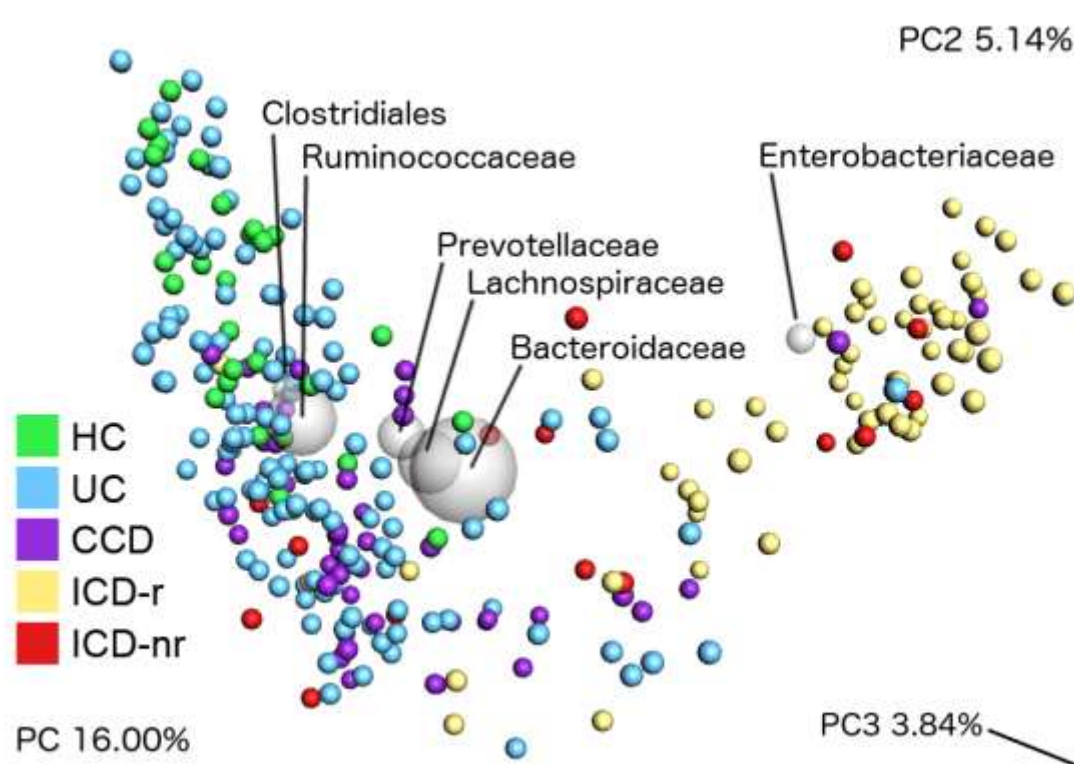

**Supplementary Figure 2. Alpha diversity of IBD-subtypes and healthy controls**

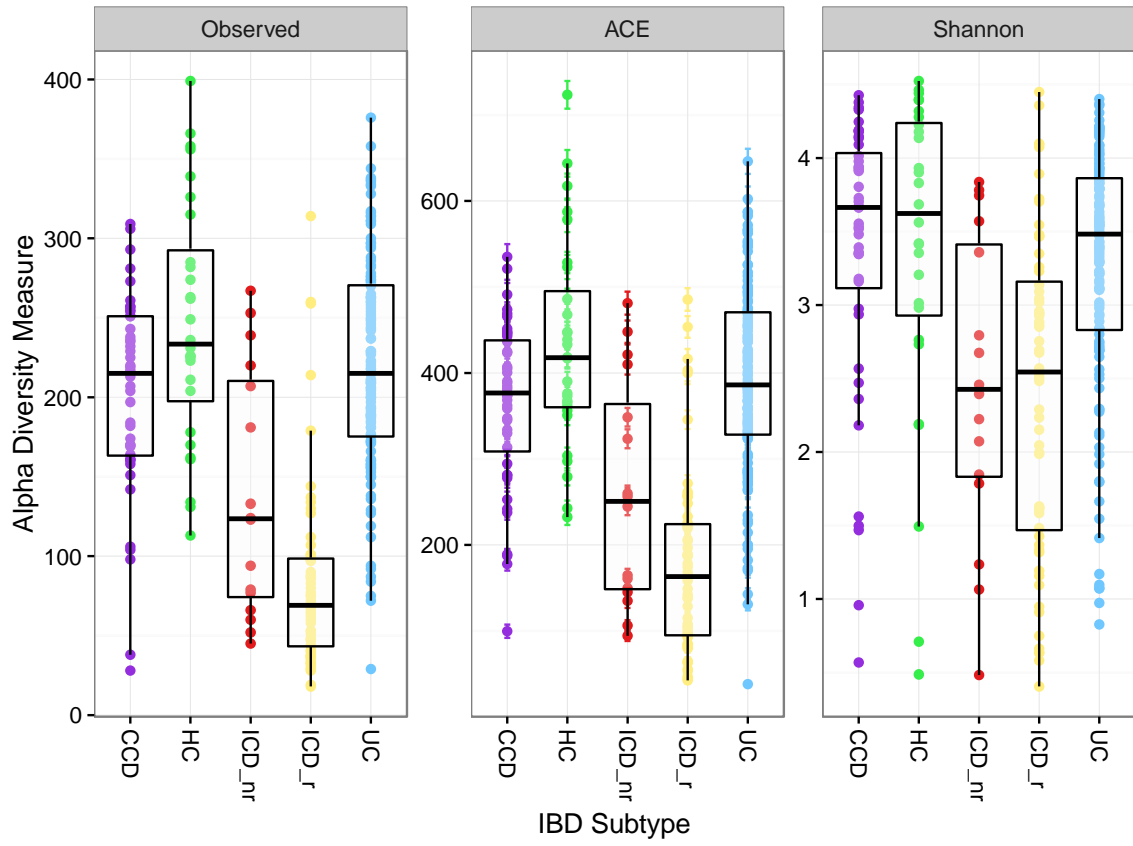

### Supplementary Figure 3. Microbiome dynamics of all individuals used in downstream analysis

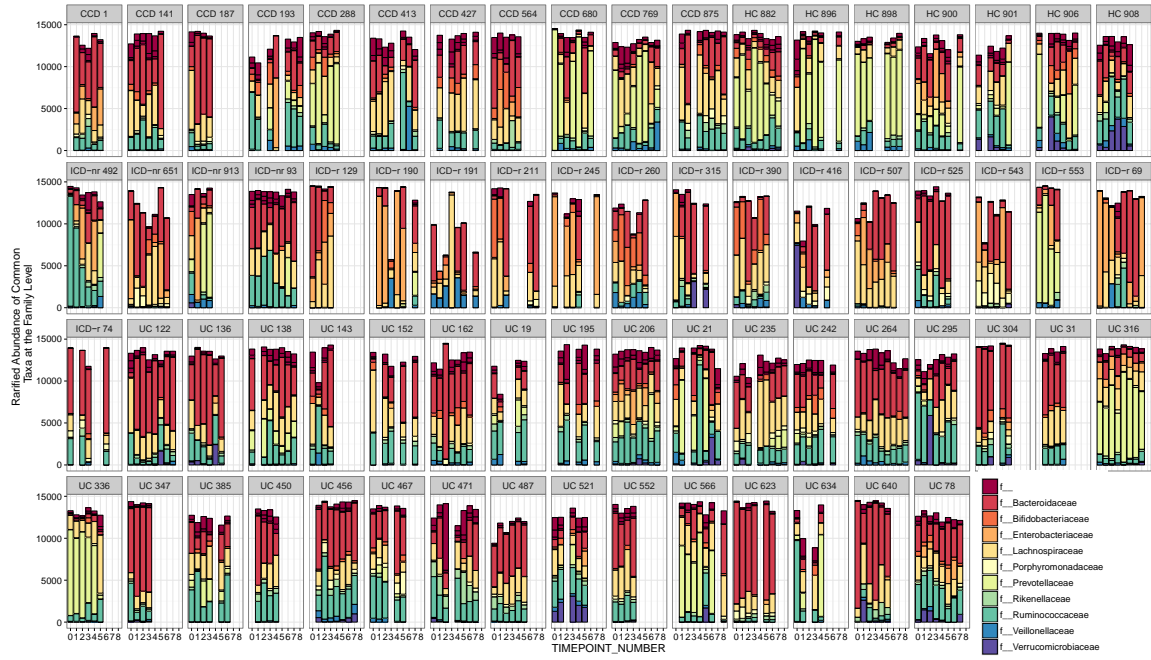

## Supplementary Figure 4. Shifts in microbiome structure in IBD patients with unstable medications

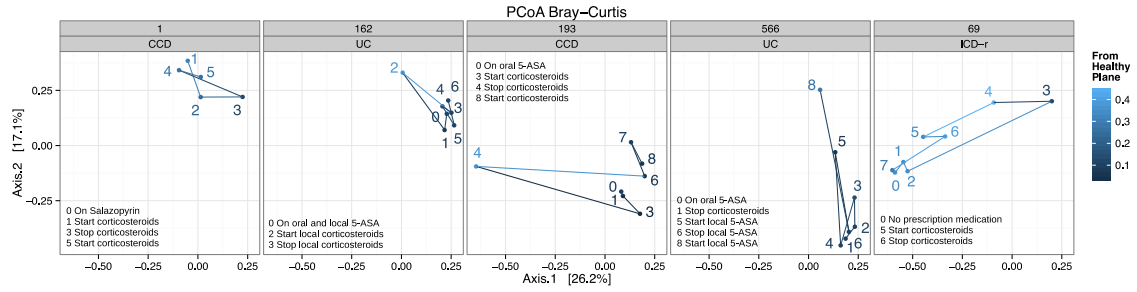

Supplement: NIHMS841832-supplement-2.pdf [file NIHMS841832-supplement-2.pdf]
